# Supplementary material for: Synthesis, determination, and bio-application in cellular and biomass-bamboo imaging of natural cinnamaldehyde derivatives
Source: Front Bioeng Biotechnol. 2022 Aug 11;10:963128. doi: 10.3389/fbioe.2022.963128 (PMC9402932; doi:10.3389/fbioe.2022.963128)
Supplement: Supplementary file 1 [file DataSheet1.doc]

**Synthesis, determination, and bio-application in cellular and biomass-bamboo imaging of natural cinnamaldehyde derivatives**

Jinlai Yang1,2,3,4,5, Rencong Guo1,2,3,4, Huimin Yang1,2,3,4, Liangru Wu1,2,3,4,5*

**Supplementary Material**

*Corresponding author: Prof. Liangru Wu

1China National Bamboo Research Center, Hangzhou 310012, Zhejiang, China.

2Key Laboratory of Bamboo Forest Ecology and Resource Utilization of National Forestry and Grassland Administration, Hangzhou 310012, Zhejiang, China.

3Key Laboratory of High Efficient Processing of Bamboo of Zhejiang Province, Hangzhou 310012, Zhejiang, China.

4National Longterm Observation and Research Station for Forest Ecosystem in Hangzhou-Jiaxing-Huzhou Plain, Hangzhou 310012, Zhejiang, China.

5Bamboo Industry (Jian'ou) Branch, Fujian Provincial Collaborative Innovation Institute, Jian'ou 353100, Fujian, China.

Email: [bamshoots@163.com](mailto:bamshoots@163.com)

**Figure S1**:

**Figure S1.** (**A**) Fluorescence intensity of compound **1,** **1**+ClO-, and **1**+ClO- when adding another ROS to the PBS buffer solution (pH=7.4, 10 mM, 50% (v/v) C2H5OH), ex=375 nm, Em. Slit=5.0 nm, Ex. Slit=6.0 nm; (**B**, **C**) Fluorescence intensity of compound **2,** **2**+ClO-, and **2**+ClO- when adding another ROS to the PBS buffer solution (pH=7.4, 10 mM, 50% (v/v) C2H5OH), ex=430 nm, with Em. Slit=5.0 nm, Ex. Slit=9.0 nm.

**Figure S2**:

**Figure S2**. (**A**) Peak fluorescence intensity of compound **1** *vs.* Fe3+ concentrations; (**B**) F404/F426 of compound **1** *vs.* ClO- concentrations; ex=375 nm, Fe3+: Em. Slit=5.0 nm, Ex. Slit=2.5 nm; ClO-: Em. Slit=5.0 nm, Ex. Slit=5.0 nm.

**Figure S3**:

**Figure S3**. Peak fluorescence intensity of compound **2** *vs.* concentrations of Fe3+ (**A**) or ClO- (**B**); ex=430 nm, Fe3+: Em. Slit=5.0 nm, Ex. Slit=5.0 nm; ClO-: Em. Slit=5.0 nm, Ex. Slit=18.0 nm.

**Figure S4**:


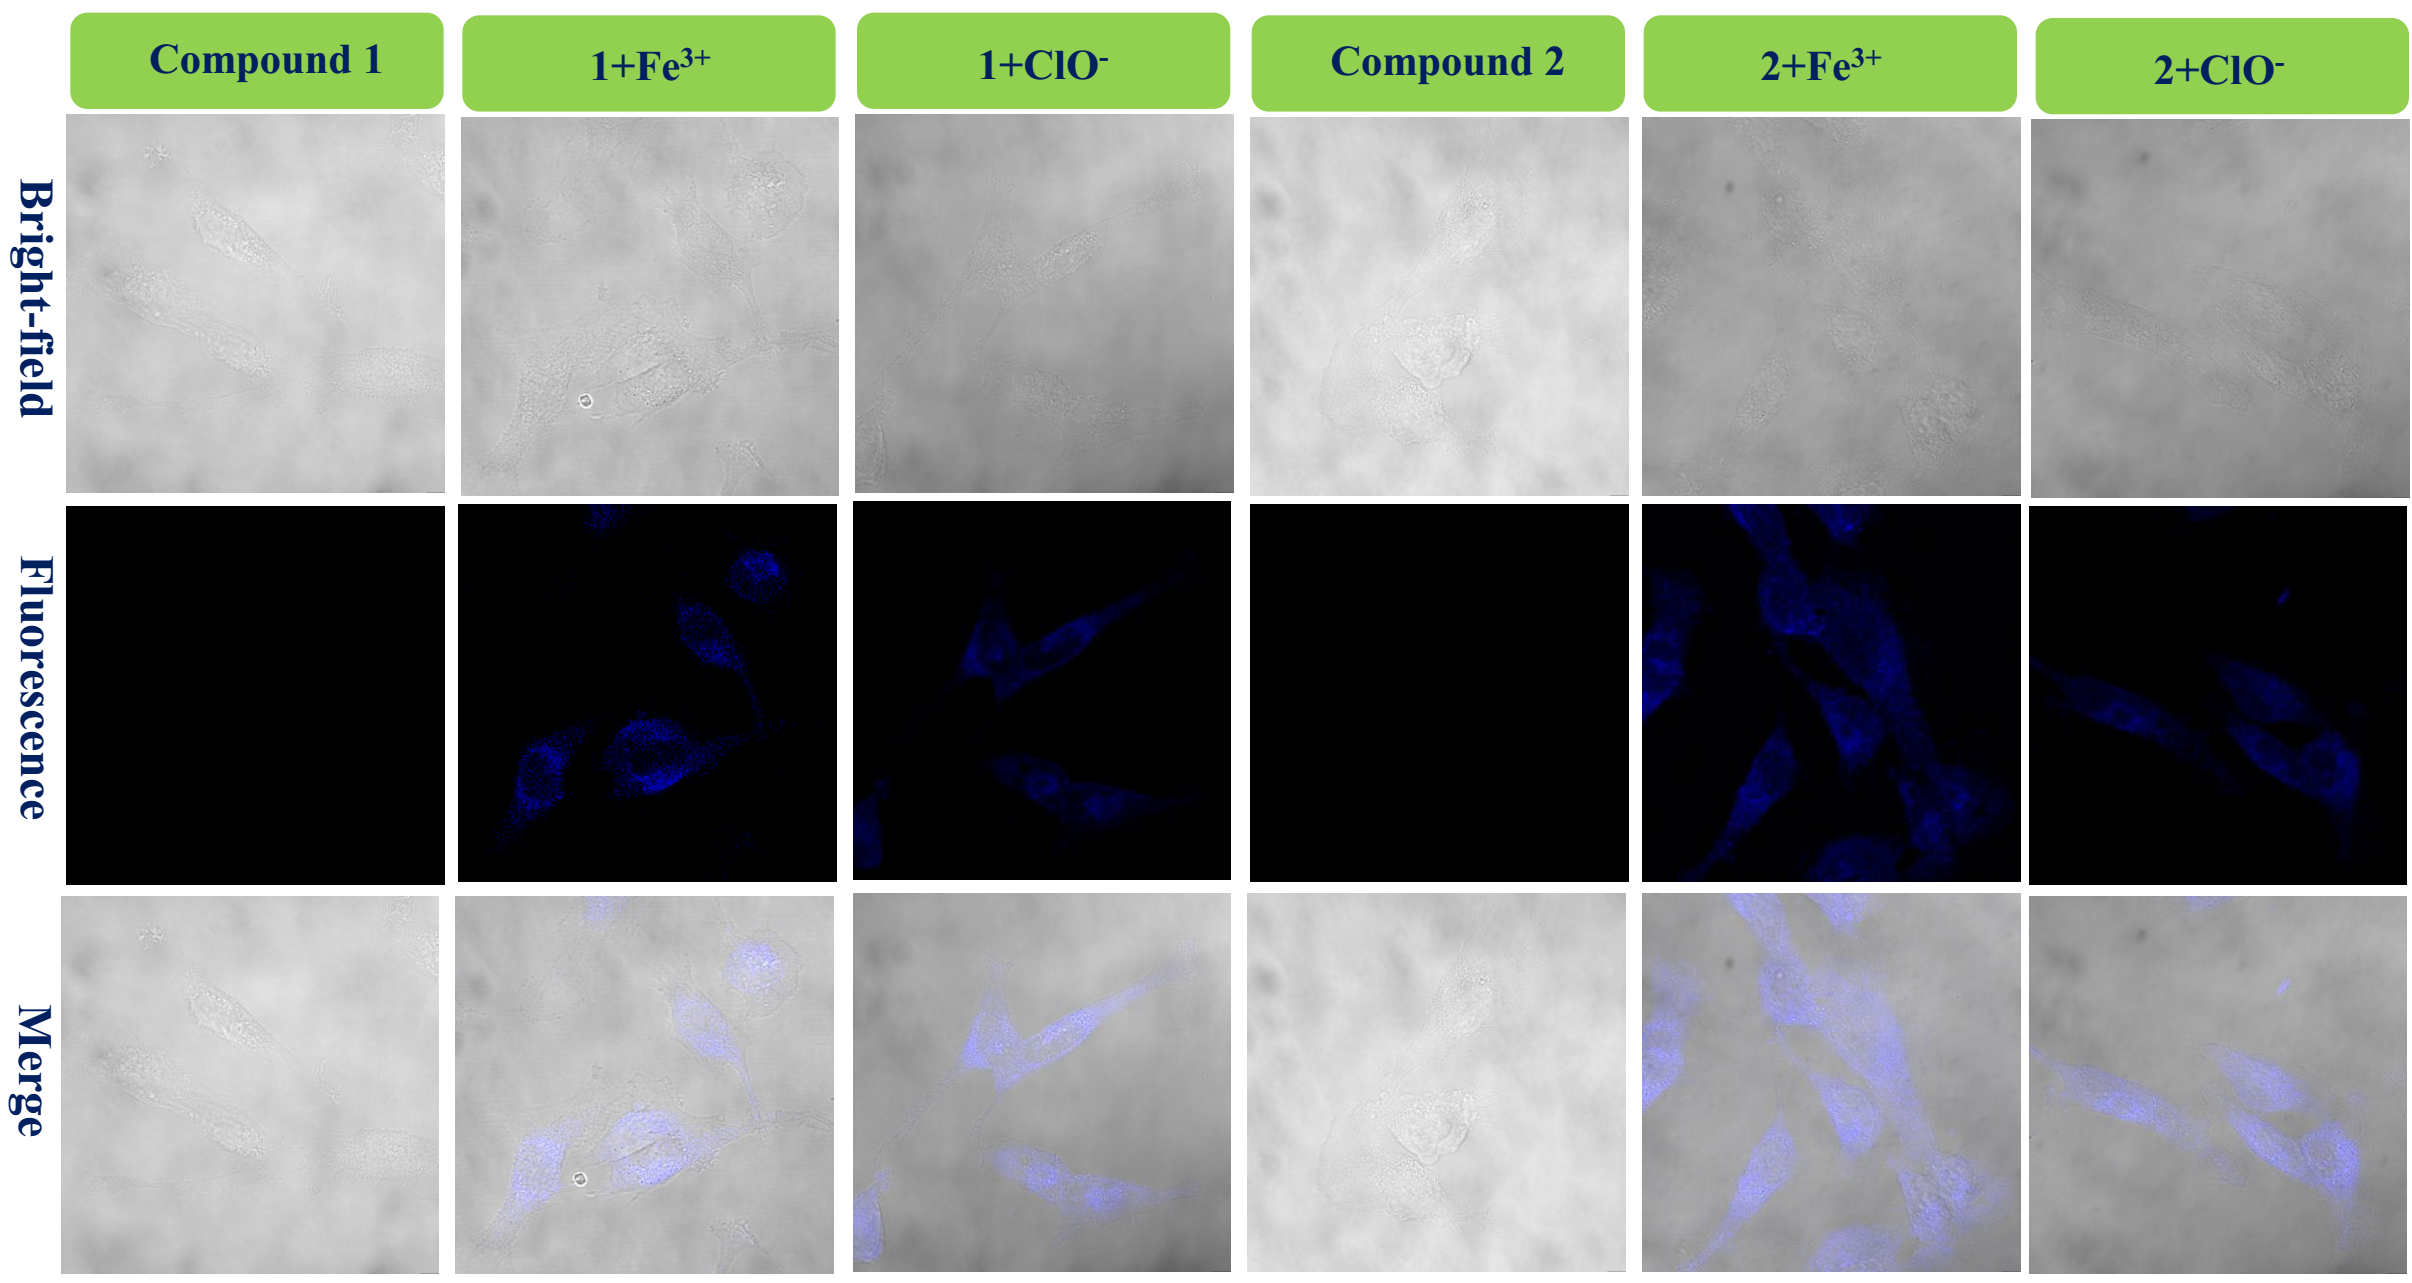


**Figure S4.** Fluorescence bio-images of the LN-229 cells of probe **1**, **1**+Fe3+, and **1**+ClO- and probe **2**, **2**+Fe3+, and **2**+ClO-.
